# Supplementary material
Source: PubMed Central journal article supplement (PMC6834660)
Supplement: 41437_2019_250_MOESM6_ESM.pdf [file 41437_2019_250_MOESM6_ESM.pdf]

Table S1. Identification of DEGs at each developmental stage of styles within each morph.

| Morph   | Pairwise comparison |                       |
|---------|---------------------|-----------------------|
|         | Big floral bud      | Early flowering stage |
| S-morph | B vs S              | E vs B                |
| L-morph | B vs S              | E vs B                |
| H-morph | B vs S              | E vs B                |

S: gene expression at small floral bud stage; B: gene expression at big floral bud stage; E: gene expression at early flowering stage.
