# Supplementary material
Source: PubMed Central journal article supplement (PMC6834660)
Supplement: 41437_2019_250_MOESM7_ESM.pdf [file 41437_2019_250_MOESM7_ESM.pdf]

Table S2. Identification of inter-morph DEGs at each developmental stage of styles.

| Intra-morph comparison | Pairwise comparison              |                                  |                                  |
|------------------------|----------------------------------|----------------------------------|----------------------------------|
|                        | Small floral bud                 | Big floral bud                   | Early flowering stage            |
| S-morph vs L-morph     | S <sub>S</sub> vs L <sub>S</sub> | S <sub>B</sub> vs L <sub>B</sub> | S <sub>E</sub> vs L <sub>E</sub> |
| S-morph vs H-morph     | S <sub>S</sub> vs H <sub>S</sub> | S <sub>B</sub> vs H <sub>B</sub> | S <sub>E</sub> vs H <sub>E</sub> |
| L-morph vs H-morph     | L <sub>S</sub> vs H <sub>S</sub> | L <sub>B</sub> vs H <sub>B</sub> | L <sub>E</sub> vs H <sub>E</sub> |

S<sub>S</sub>, S<sub>B</sub>, and S<sub>E</sub> refer to gene expression at each developmental stage in S-morphs, L<sub>S</sub>, L<sub>B</sub>, and L<sub>E</sub> refer to gene expression at each developmental stage in L-morphs, and H<sub>S</sub>, H<sub>B</sub>, and H<sub>E</sub> refer to gene expression at each developmental stage in H-morphs.
