# Supplementary material
Source: PubMed Central journal article supplement (PMC6834660)
Supplement: 41437_2019_250_MOESM9_ESM.pdf [file 41437_2019_250_MOESM9_ESM.pdf]

Table S4 Statistics for function annotation

| Anno_Database | Annotated_Number | 300<=length<1000 | length>=1000 |
|---------------|------------------|------------------|--------------|
| COG           | 24175            | 14887            | 9288         |
| GO            | 37423            | 22187            | 15236        |
| KEGG          | 16426            | 10232            | 6194         |
| KOG           | 37226            | 22185            | 15041        |
| Pfam          | 38894            | 21072            | 17822        |
| Swissprot     | 44936            | 25983            | 18953        |
| nr            | 66067            | 41336            | 24731        |
| All_Annotated | 68851            | 43782            | 25069        |
