# Supplementary material
Source: PubMed Central journal article supplement (PMC6834660)

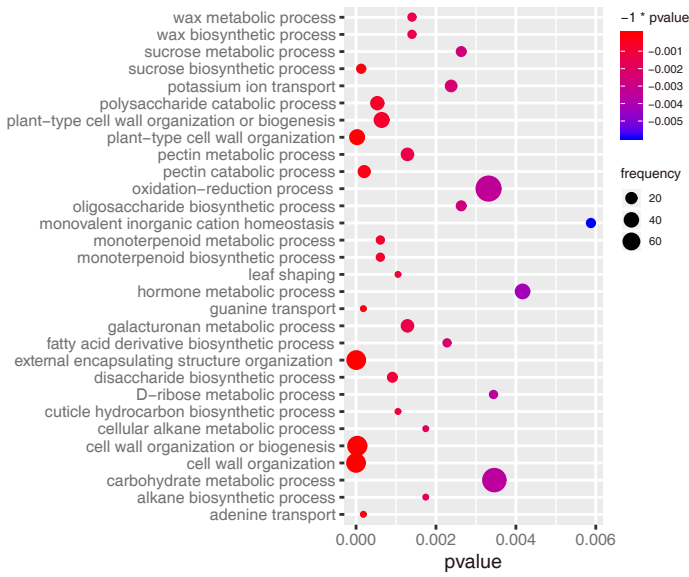

Small floral bud

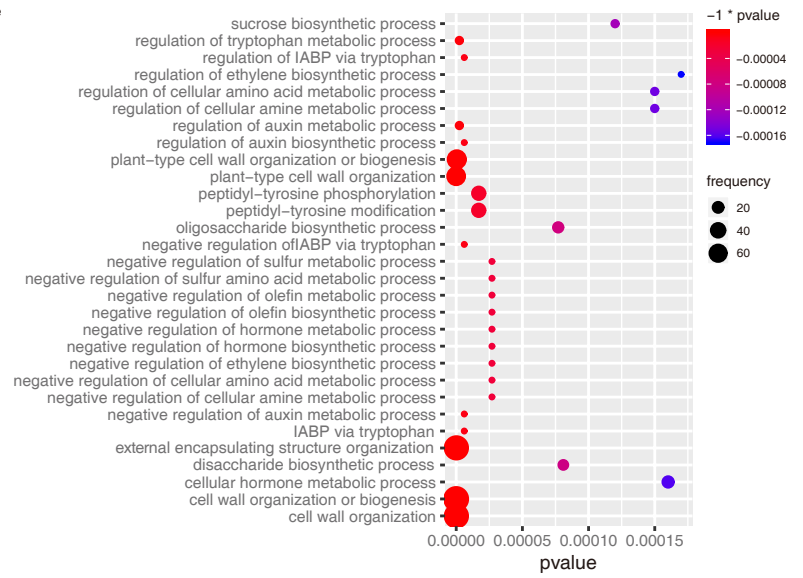

Big floral bud

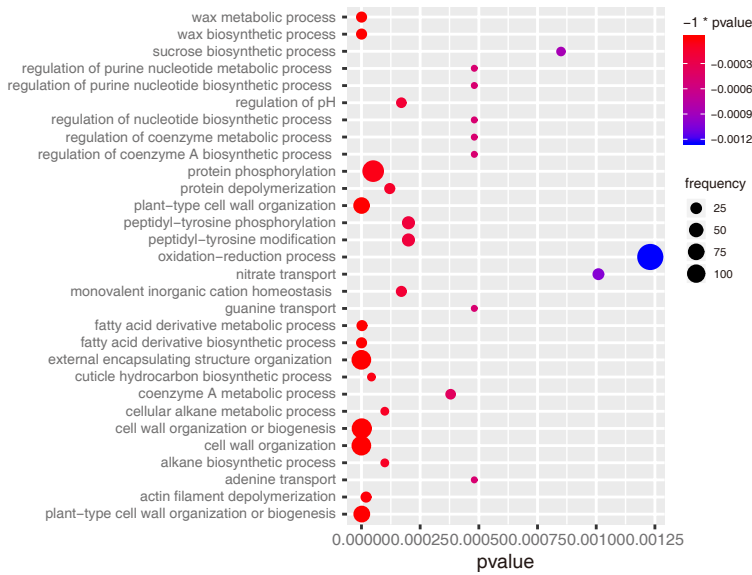

Early flowering stage

Supplement: 41437_2019_250_MOESM3_ESM.pdf [file 41437_2019_250_MOESM3_ESM.pdf]

A

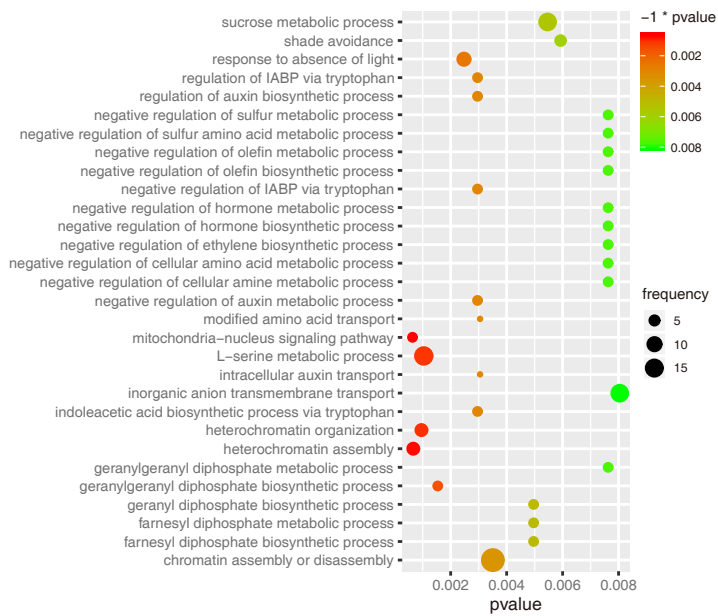

B

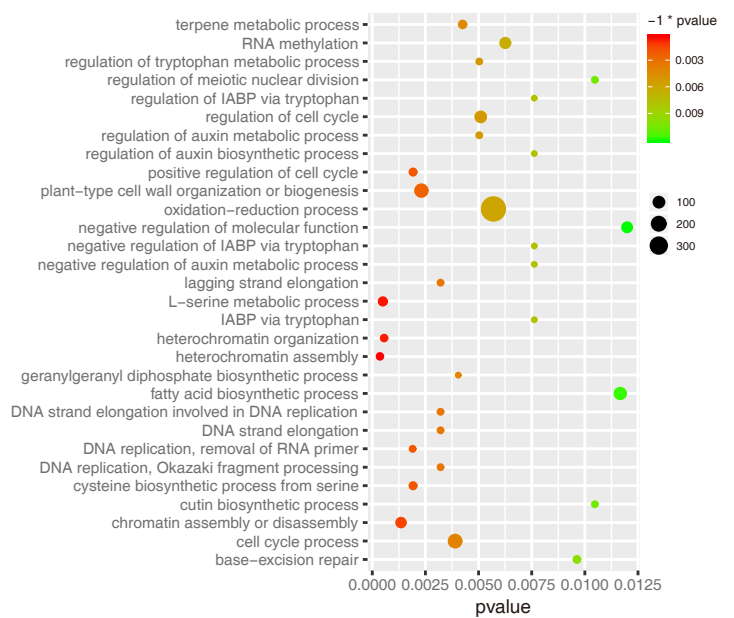

C

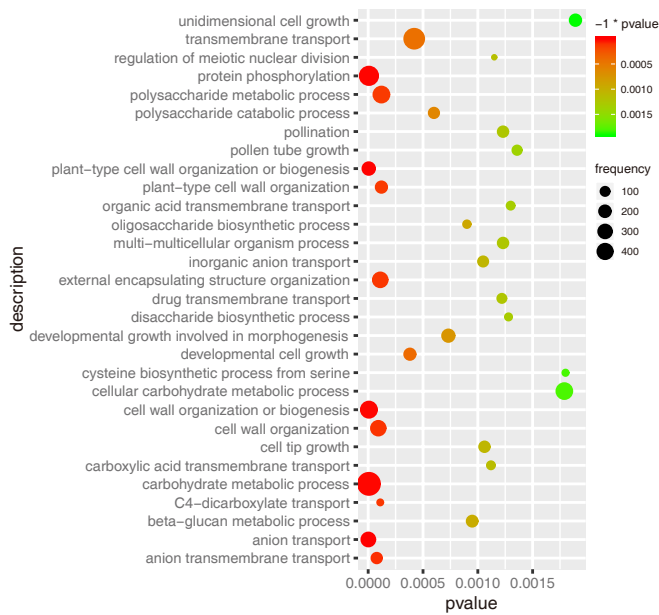

A: Small flower bud

B: Big flower bud

C: Early flowering stage

Supplement: 41437_2019_250_MOESM4_ESM.pdf [file 41437_2019_250_MOESM4_ESM.pdf]
